# Supplementary material for: Protein painting reveals solvent-excluded drug targets hidden within native protein–protein interfaces
Source: PubMed Central journal article supplement — Nat Commun. 2014 Jul 22;5:4413. doi: 10.1038/ncomms5413 (PMC4109009; doi:10.1038/ncomms5413), 2014-07-22
Supplement: ncomms5413-s1.pdf [file ncomms5413-s1.pdf]

**a**

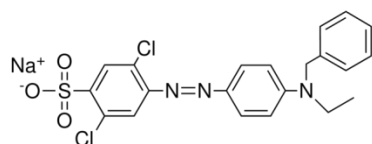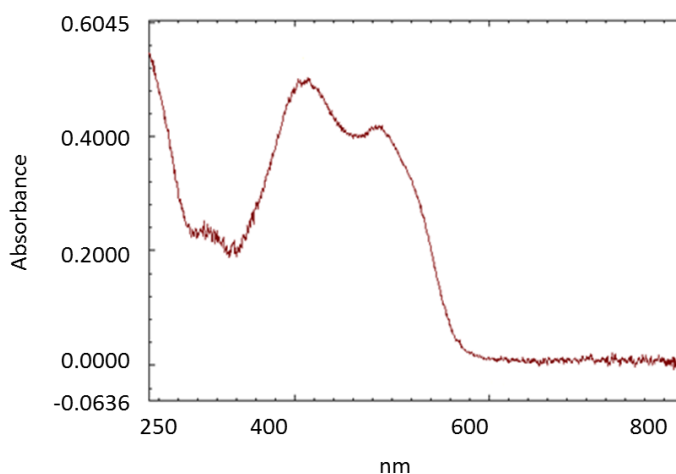

**b**

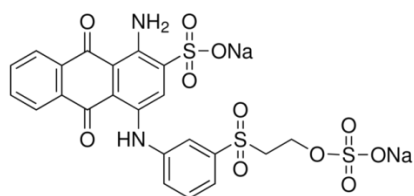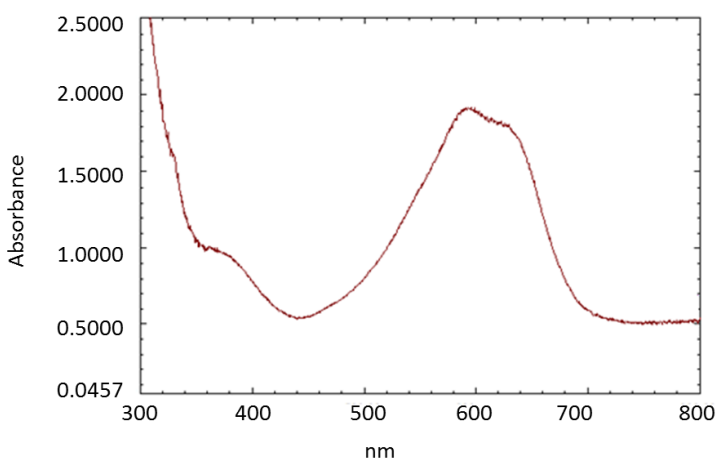

**Supplementary Figure 1 | Molecular formula and absorbance spectrum for paint molecules selected for their low dissociation rate with CA and the capability to remain bound to CA after denaturation, reduction and alkylation.** a) sodium 4-(4-(benzyl-ethyl-amino)-ph-azo)-2,5-di-chlorobenzenesulfonate. b) 10-dioxo-4-[3-(2-sulfonatoxyethylsulfonyl) anilino] anthracene-2-sulfonate. The characteristic peak absorbance wavelengths determined above were employed for the measurement of binding kinetics shown in Figure 2.

a

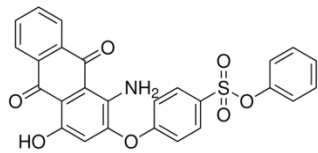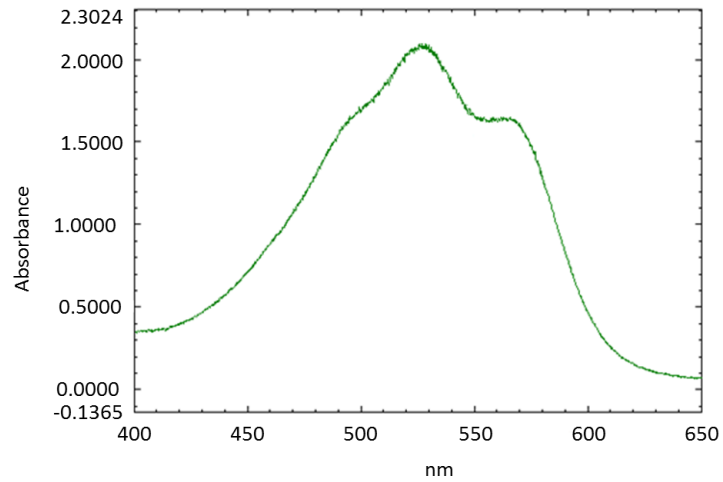

b

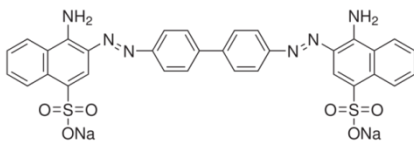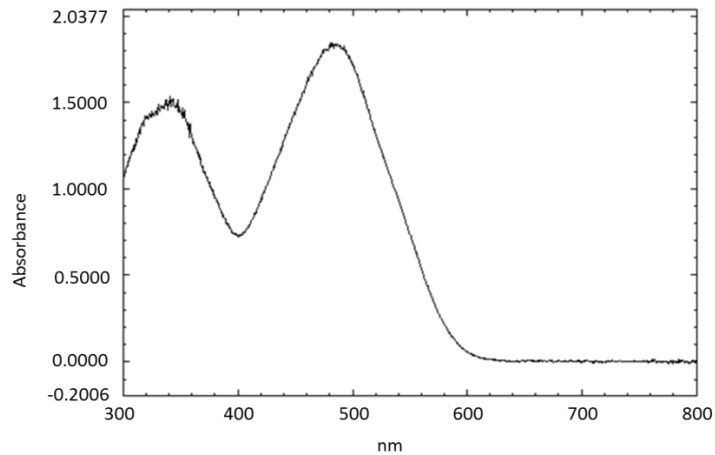

**Supplementary Figure 2 | Molecular formula and absorbance spectrum for paint molecules selected for their low dissociation rate with CA and the capability to remain bound to CA after denaturation, reduction and alkylation.** a) Phenyl 4-[(1-amino-4-hydroxy-9,10-dioxo-9,10-dihydro-2-anthracenyl)oxy]benzenesulfonate; and disodium; b) 4-amino-3-[4-[4-[(1-amino-4-sulfonatophthalen-2-yl)diazenyl] phenyl]phenyl]diazenyl]naphthalene-1-sulfonate, respectively. The characteristic peak absorbance wavelengths determined above were employed for the measurement of binding kinetics shown in Figure 2.

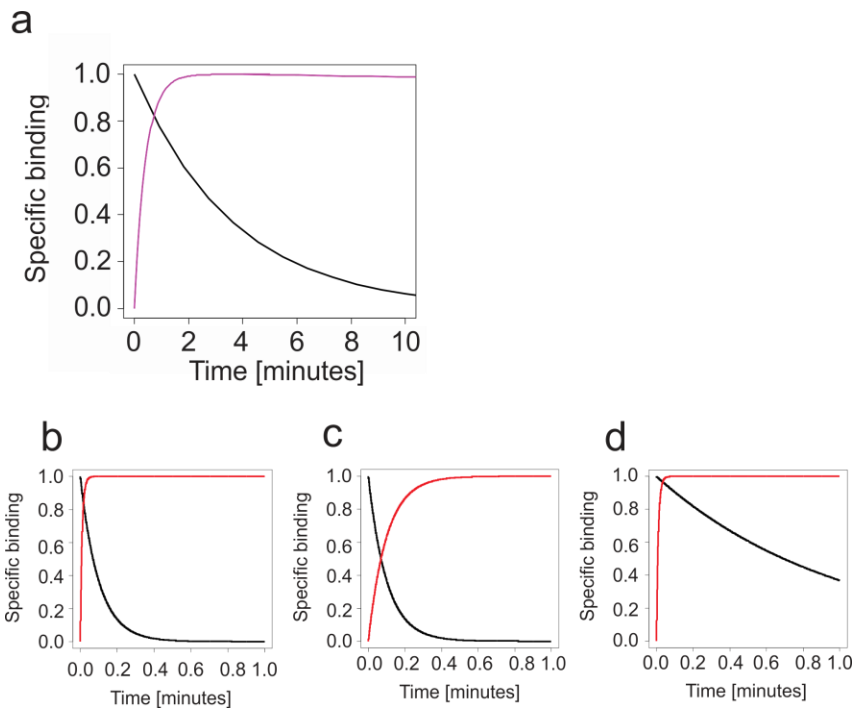

**Supplementary Figure 3 | Weak transient interactions can be captured with protein painting and will not cause false positives.**

a) First order reaction kinetics calculations were applied in order to show that a 5 minute pulse of highly concentrated molecular paint (RBB) can cover the surface of the IL1 $\beta$ -IL1RI complex when most (83%) of known protein binding partners are in the complexed form. The dissociation constant for IL1  $\beta$  was experimentally derived ( $k_{\text{diss}} = 0.252 \text{ min}^{-1}$ ) and  $K_d = 72 \cdot 10^{-9} \text{ M}$ . This complex is considered a strong transient complex.  $K_{\text{ass}} \cdot [\text{RBB}]$  was experimentally derived from Figure 2 ( $2.4342 \text{ min}^{-1}$ ). b) Simulations show that for every protein-protein dissociation constant ( $k_{\text{diss}} \text{ PP}$ ), if  $k_{\text{ass}} \text{ MP} \cdot [\text{MP}] > k_{\text{diss}} \text{ PP}$  of one order of magnitude, then the protein-molecular paint binding equilibrium will be reached when 83% of protein protein transient complex is still in the complexed form (P = protein, M = paint molecule, MP = protein-paint molecule complex,  $k_{\text{ass}} \text{ MP}$  association constant of protein-paint molecule binding reaction). c) If  $k_{\text{ass}} \text{ MP} \cdot [\text{MP}]$  and  $k_{\text{diss}} \text{ PP}$  have the same order of magnitude the protein-molecular paint binding equilibrium will be reached when 50% of protein protein transient complex is still in the complexed form. d) If  $k_{\text{ass}} \text{ MP} \cdot [\text{MP}] > k_{\text{diss}} \text{ PP}$  of two orders of magnitude, then the protein-molecular paint binding equilibrium will be reached when 97% of protein protein transient complex is still in the complexed form.

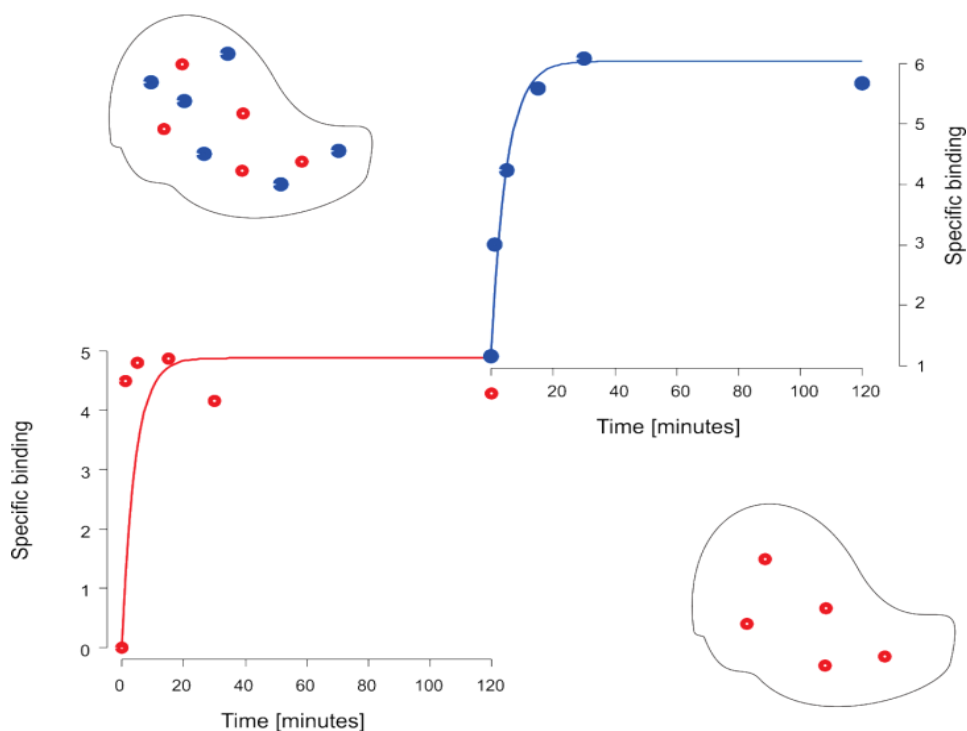

**Supplementary Figure 4 | Sequential binding of two different dyes documents complementarity and rapid saturation kinetics of the dyes to achieve broad coverage of trypsin cleavage sites exposed on the surface.** CA (1 nmole) and AO50 (10 nmoles) in 50  $\mu$ L PBS were allowed to reach equilibrium (1 hour incubation time) and then unbound dye was separated via mini Quick Spin Oligo columns as described in the Methods. RBB (10 nmoles) was allowed to interact with AO50-painted CA for different time periods (0, 1, 5, 15, 40, and 120 minutes). Specific binding ( $[AO50]/[CA]$  and  $[RBB]/[CA]$ ) was plotted against incubation times. Binding kinetics revealed that 6 moles of RBB bound to every mole of CA thus suggesting that RBB and AO50, examples of two different separate paint molecules, could bind at different regions on the protein surface.

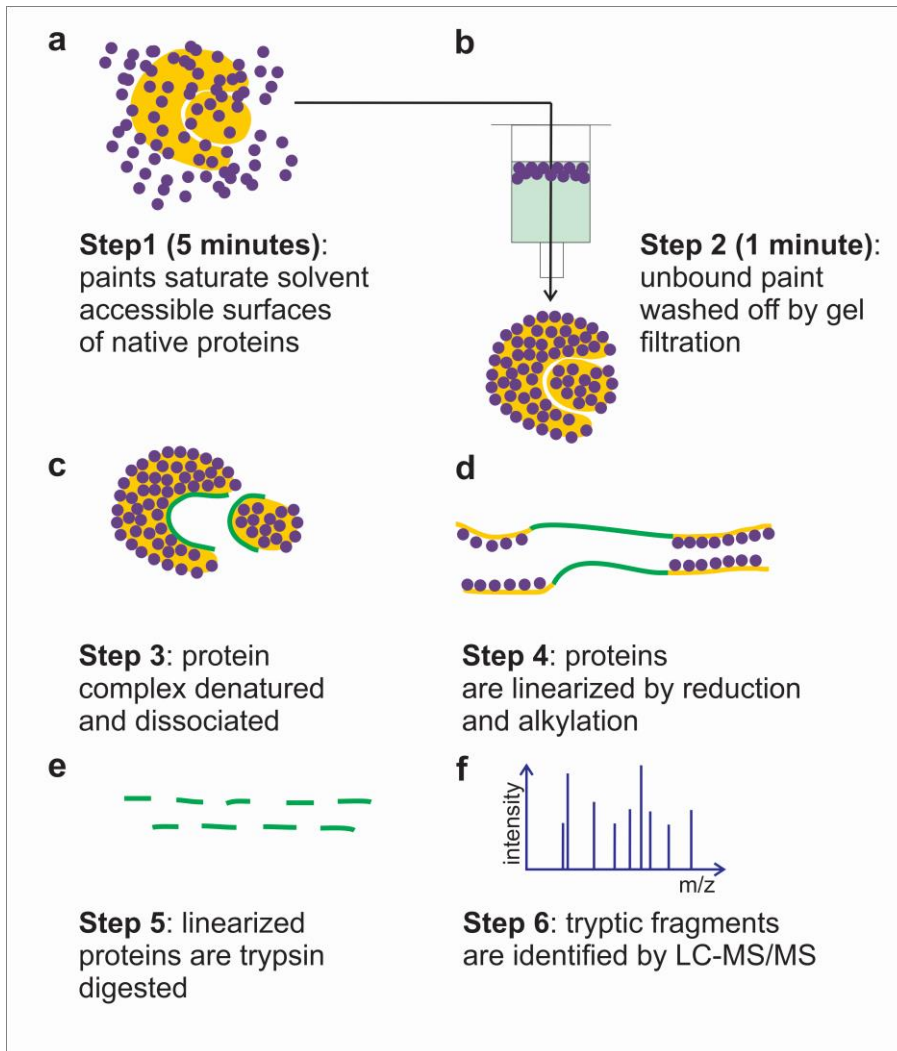

**Supplementary Figure 5 | Protein painting workflow.** (a) Proteins are pulsed with 10 molar excess small molecule molecular paints for 5 minutes. (b) Unbound paint molecules are washed away with gel filtration chromatography (mini Quick Spin Oligo Column, Roche). (c) The protein complex is dissociated and denatured with 2 M urea. (d) Proteins are linearized by dithiothreitol (DTT) reduction and iodoacetamide alkylation. (e) Linearized proteins are subjected to trypsin digestion. (f) Tryptic fragments are analyzed by reversed-phase liquid chromatography nanospray tandem mass spectrometry (LC-MS/MS). The bound molecular paints block trypsin cleavage sites. Therefore tryptic fragments are generated only from unpainted contact interface regions of the protein complex. After verifying that the dyes (paints) will block the trypsin cleavage sites on the protein(s) of interest, the user can then interrogate pre-formed protein complexes. As shown in Figure 4, a subset of four dyes can cover all the known trypsin consensus cleavage sites. Nevertheless, since we have not tested the dyes shown in Supplementary Table 2 against all known proteins, we are recommending that the user first confirms that the dyes will bind to their protein of interest and block the trypsin cleavage sites (Fig. 1). This step is also necessary to generate the data for differential comparison of the protein before and after complex formation.

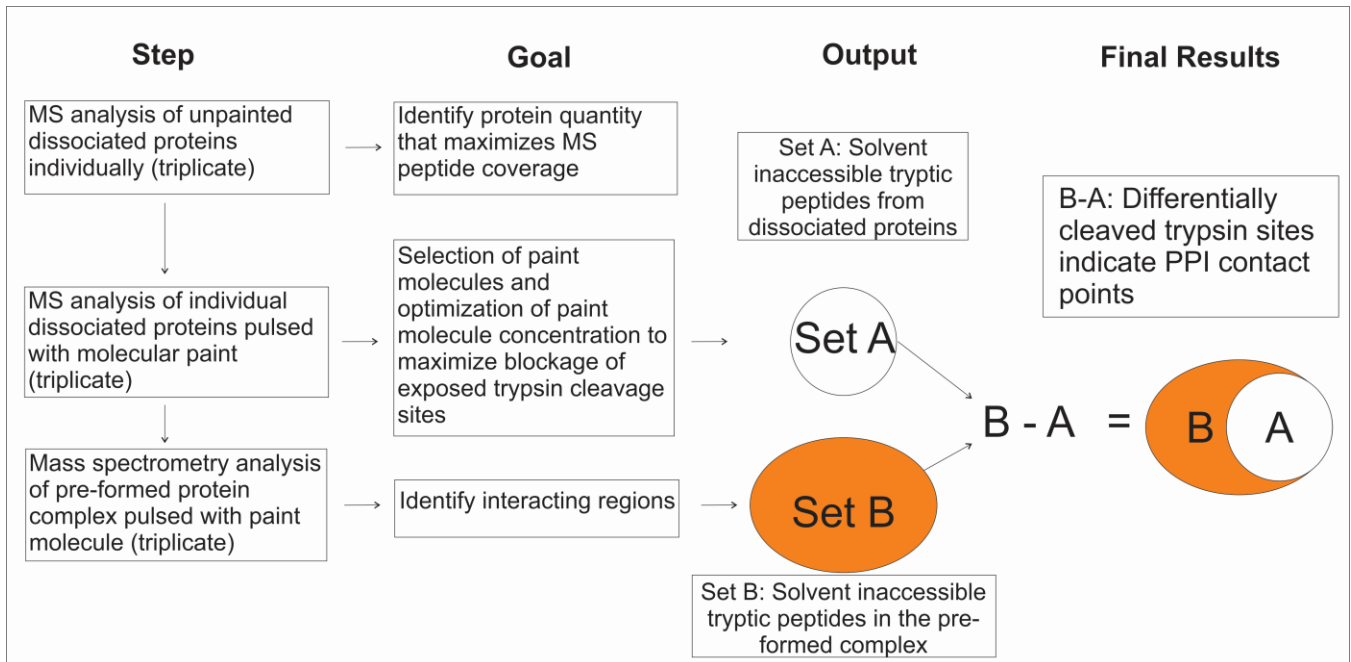

**Supplementary Figure 6 | Mass spectrometry workflow.** Mass spectrometry workflow steps for protein painting differentiates internal interface regions within an individual folded protein from the surface contact regions between protein partners: Step 1) Analyses of unpainted individual proteins are carried on in order to maximize the tryptic peptide coverage. Step 2) Analyses of painted dissociated proteins yields a set of peptide fragments (set A) relative to solvent inaccessible trypsin cleavage sites for each individual protein 3) Analyses of the pre-formed protein-protein complex pulsed with paint molecules yields a set of peptide fragments (set B) derived from solvent inaccessible trypsin cleavage sites belonging to protein-protein interface regions. The difference between set B – set A is the output of the method. MS = mass spectrometry; PPI = protein-protein interaction.

**a**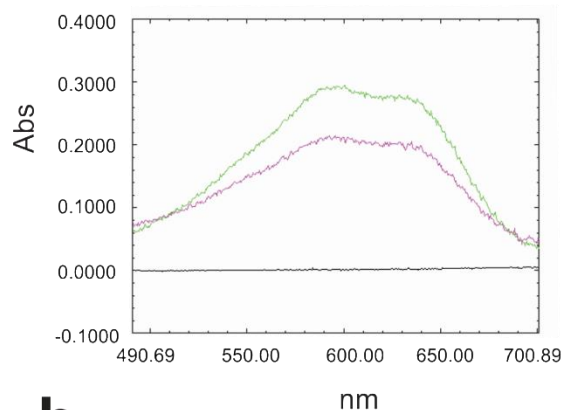**b**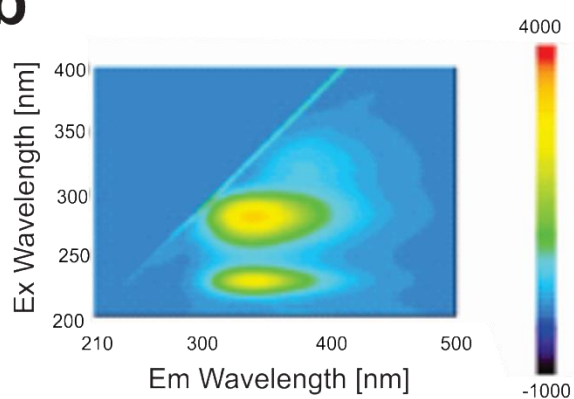**c**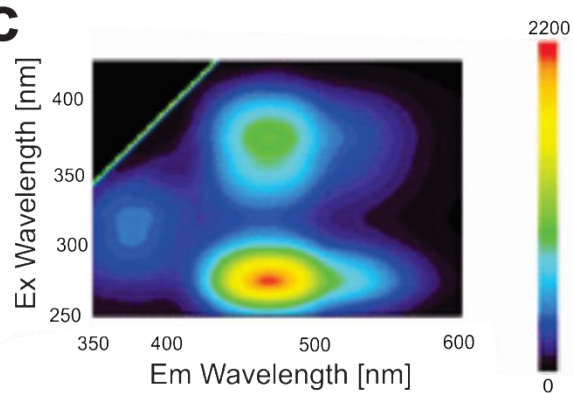

**Supplementary Figure 7 | UV-VIS and fluorescence spectra of protein and paint molecules.** a) Absorbance spectra are presented for CA (20  $\mu$ M in PBS, black trace), RBB (40  $\mu$ M in PBS, green trace) and the complex CA/RBB (20 and 40  $\mu$ M respectively, magenta trace). b) 3D fluorescence spectrum of CA (10  $\mu$ M in PBS). c) 3D fluorescence spectrum of ANSA (30 mM in 100% ethanol).

MSHHWGYG ~~X~~ HNGPEHWH ~~X~~ DFPIANGE ~~R~~ QSPVDIDT ~~X~~ AVVQDPALKPLALVYGEAT  
 S ~~R~~ ~~R~~ MVNNGHSFNVEYDDSQD ~~K~~ ~~K~~ AVL ~~K~~ DGPLTGTY ~~R~~ LVQFHFWGSSDDQGSEHTV  
 D ~~R~~ ~~R~~ ~~R~~ YAAELHLVHWNT ~~K~~ YGDFGTAAQQPDGLAVVGVFL ~~K~~ VGDANPALQ ~~K~~ VLDALD  
 S ~~K~~ ~~K~~ T ~~K~~ GKSTDFPNFDPGSELLPNVLDYWTYPGSLTTPPLLESVTWIVL ~~K~~ EPISVSSQQ  
 ML ~~K~~ ~~R~~ ~~R~~ TLNFNAEGEPELLMLANW ~~R~~ PAQPLKNRQVRGFPK

**Supplementary Figure 8 | Selected molecular paints are complementary to each other and block all trypsin cleavage sites of carbonic anhydrase II.** Molecular paints (RBB: blue “X”, AO50: orange “X”, R49: orange “X”, and CR: red “X”) blocked all (100%) consensus trypsin cleavage sites and showed complementarity.



## IL1 $\beta$

APV**R**SLNCTLRDS**Q**Q**K**SLVMSGPYEL**K**ALHLQGQDMEQQVVFSMSFVQGE  
ESND**K**IPVALGLKE**K**NLYLSCVLKDDKPTLQLESVDPKNYP**KKK**MEKRFVFN**K**  
EINN**K**LEFESAQFPNWWYISTS**QAENMPVFLGGT****K**GGQDITDFTMQFVSS

## IL1RI

DKCKEREE**K**ILVSSANEIDVRPCPLNPNEH**K**GTITWYKDDSKTPVSTEQASRI  
HQHKEKLWFVPAKVEDSGHYCVVRNSSYCLRIKISAKFVENEPNLCYNA**QAI**  
**FK****K**LPVAGDGGGLVCPYMEFF**K**NENNELPKLQWYKDCCKPLLLDNIHFSGVKD  
**R**LIVMNVAEKH**R**GNYTCHASYTYLGKQYPITRVIEFIT**LEEN**KPTRPVIVSPAN  
TMEVDLGSQIQLICNVTGQL**LSDIAY**WKWNGS**VIDEDDPVLGEDYYS**VENPAN  
KRRSTLITVLNISEIES**R**FYKHPFTCF**K**NTHGIDAAYIQLIYPVTNFQK

**Supplementary Figure 9 | Mass spectrometry identified trypsin cleavage sites within interface domains of the painted native IL1 $\beta$ -IL1RI complex.** Interfacing residues predicted by crystal structure (PDBePISA software<sup>2</sup> on PDB entry 1ITB) in the IL1 $\beta$ -IL1RI complex are highlighted in yellow. Resolution of our protein painting method is determined by the nearest trypsin cleavage site at or near the contact point/close interface, where there is solvent exclusion, hydrogen bonds and salt bridges. Trypsin cleavage sites (R or K) revealed by protein painting followed by mass spectrometry are labeled and compared to the crystal structure predicted interfaces. All the consensus trypsin cleavage sites that were within 9 amino acids of a contact point predicted by crystal structure were correctly identified by protein painting and mass spectrometry analysis (Fisher exact test p-value = 0.0003, odds ratio = 13.49206). It's important to note that an MS peptide revealed by protein painting constitutes a true positive independent of the MS protein coverage.

| AA | A           | B           | Y           |
|----|-------------|-------------|-------------|
| F  | 120.0807757 | 148.0756904 | -           |
| Y  | 283.1441043 | 311.1390189 | 1298.635071 |
| K  | 411.2390673 | 439.2339819 | 1135.571743 |
| H  | 548.2979791 | 576.2928937 | 1007.47678  |
| P  | 645.350743  | 673.3456576 | 870.417868  |
| F  | 792.4191569 | 820.4140715 | 773.3651042 |
| T  | 893.4668353 | 921.4617499 | 626.2966903 |
| C  | 1053.497515 | 1081.49243  | 525.2490118 |
| F  | 1200.565929 | 1228.560844 | 365.2183318 |
| A  | 1271.603043 | 1299.597958 | 218.1499179 |
| K  | -           | -           | 147.1128041 |

Interface residue: IL1RI Lys298  
 Peptide: FYKHPFTCFAK  
 Precursor ion: 723.35068  
 Charge 2  
 Scan 1984  
 P(pep) 9.0E-7

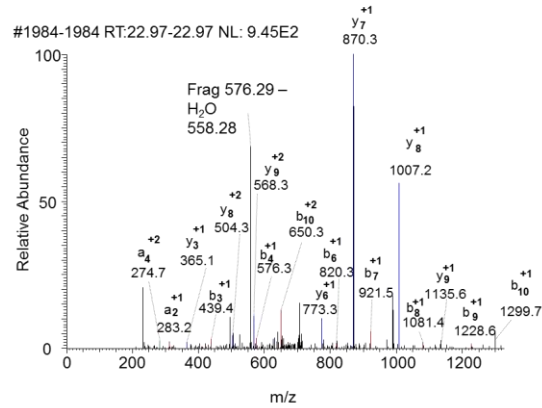

Supplementary Figure 10 | Peptide FYKHPFTCFAK identified with mass spectrometry relative to the interface regions of IL1 $\beta$ -IL1RI complex.

| AA | A           | B           | Y           |
|----|-------------|-------------|-------------|
| I  | 86.09642579 | 114.0913404 | -           |
| I  | 199.1804898 | 227.1754044 | 2502.276964 |
| L  | 312.2645537 | 340.2594683 | 2389.1929   |
| V  | 411.3329676 | 439.3278822 | 2276.108836 |
| S  | 498.364996  | 526.3599106 | 2177.040422 |
| S  | 585.3970244 | 613.391939  | 2090.008394 |
| A  | 656.4341382 | 684.4290528 | 2002.976366 |
| N  | 770.4770656 | 798.4719803 | 1931.939252 |
| E  | 899.5196587 | 927.5145733 | 1817.896324 |
| I  | 1012.603723 | 1040.598637 | 1688.853731 |
| D  | 1127.630666 | 1155.62558  | 1575.769667 |
| V  | 1226.69908  | 1254.693994 | 1460.742724 |
| R  | 1382.800191 | 1410.795105 | 1361.67431  |
| P  | 1479.852954 | 1507.847869 | 1205.573199 |
| C  | 1639.883634 | 1667.878549 | 1108.520436 |
| P  | 1736.936398 | 1764.931313 | 948.4897556 |
| L  | 1850.020462 | 1878.015377 | 851.4386918 |
| N  | 1964.06339  | 1992.058304 | 738.3529278 |
| P  | 2061.116154 | 2089.111068 | 624.3100004 |
| N  | 2175.159081 | 2203.153996 | 527.2572365 |
| E  | 2304.201674 | 2332.196589 | 413.2143091 |
| H  | 2441.260586 | 2469.255501 | 284.171716  |
| K  | -           | -           | 147.1128041 |

Interface residue: IL1RI Lys12  
 Peptide: IILVSSANEIDVRPCPLNPNEHK  
 P (pep) 5.8E-11  
 Precursor ion 872.46216  
 Charge 3  
 Scan 2620

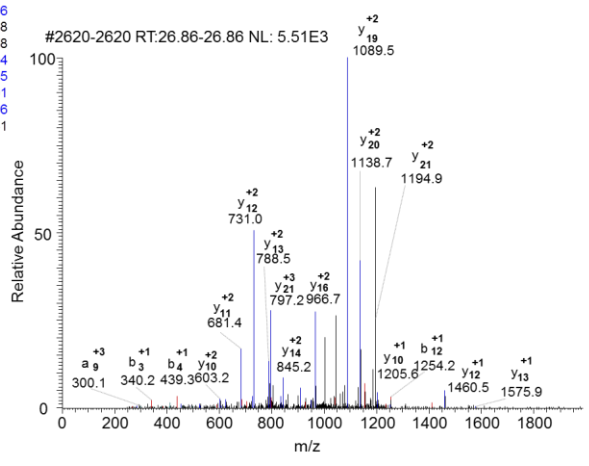

Supplementary Figure 11 | Peptide IILVSSANEIDVRPCPLNPNEHK identified with mass spectrometry relative to the interface regions of IL1β-IL1RI complex.

| AA | A           | B           | Y         |
|----|-------------|-------------|-----------|
| L  | 86.09642579 | 114.0913404 | -         |
| I  | 199.1804898 | 227.1754044 | 1196.6568 |
| V  | 298.2489037 | 326.2438183 | 1083.5728 |
| M  | 429.2893883 | 457.2843029 | 984.50436 |
| N  | 543.3323157 | 571.3272303 | 853.46388 |
| V  | 642.4007296 | 670.3956442 | 739.42095 |
| A  | 713.4378434 | 741.432758  | 640.35253 |
| E  | 842.4804365 | 870.4753511 | 569.31542 |
| K  | 970.5753995 | 998.5703141 | 440.27283 |
| H  | 1107.634311 | 1135.629226 | 312.17786 |
| R  | -           | -           | 175.11895 |

Interface residue: IL1RI Arg163

Peptide: LIVMNVAEKHR

precursor ion: 655.37561

Charge 2

P(pep) 2.2E-9

Scan 1542

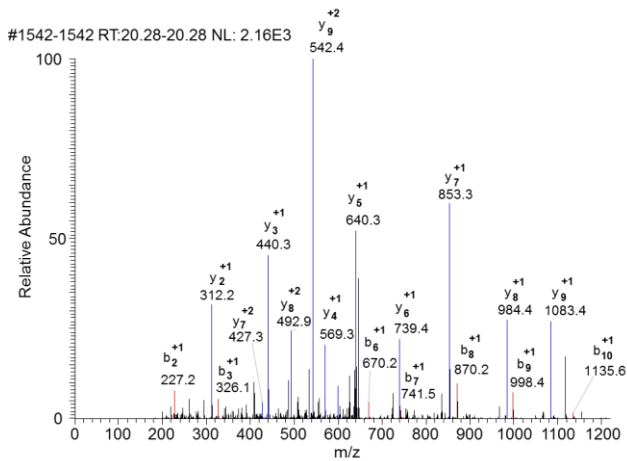

**Supplementary Figure 12 | Peptide LIVMNVAEKHR identified with mass spectrometry relative to the interface regions of IL1β-IL1RI complex.**

| AA | A           | B           | Y           |
|----|-------------|-------------|-------------|
| L  | 86.09642579 | 114.0913404 | -           |
| P  | 183.1491896 | 211.1441043 | 2825.327345 |
| V  | 282.2176035 | 310.2125182 | 2728.274581 |
| A  | 353.2547173 | 381.2496319 | 2629.206167 |
| G  | 410.276181  | 438.2710957 | 2558.169053 |
| D  | 525.3031241 | 553.2980387 | 2501.14759  |
| G  | 582.3245878 | 610.3195024 | 2386.120647 |
| G  | 639.3460515 | 667.3409661 | 2329.099183 |
| L  | 752.4301155 | 780.4250301 | 2272.077719 |
| V  | 851.4985294 | 879.493444  | 2158.993655 |
| C  | 1011.529209 | 1039.524124 | 2059.925241 |
| P  | 1108.581973 | 1136.576888 | 1899.894561 |
| Y  | 1271.645302 | 1299.640216 | 1802.841797 |
| M  | 1402.685786 | 1430.680701 | 1639.778469 |
| E  | 1531.728379 | 1559.723294 | 1508.737984 |
| F  | 1678.796793 | 1706.791708 | 1379.695391 |
| F  | 1825.865207 | 1853.860122 | 1232.828977 |
| K  | 1953.96017  | 1981.955085 | 1085.558563 |
| N  | 2068.003098 | 2095.998012 | 957.4636004 |
| E  | 2197.045691 | 2225.040805 | 843.420673  |
| N  | 2311.088618 | 2339.083533 | 714.3780799 |
| N  | 2425.131546 | 2453.12646  | 600.3351525 |
| E  | 2554.174139 | 2582.169053 | 486.292225  |
| L  | 2667.258203 | 2695.253117 | 357.2496319 |
| P  | 2764.310967 | 2792.305881 | 244.165568  |
| K  | -           | -           | 147.1128041 |

Interface residues: IL1R1 Lys114, Lys132  
 Peptide: LPVAGDGGLVCPYMEFFKNENNELPK  
 Precursor ion 980.14722  
 Charge 3  
 Scan 3749  
 P(pep) 6.7E-16

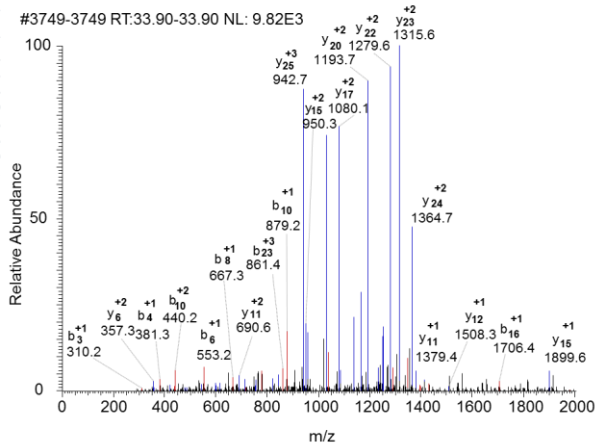

Supplementary Figure 13 | Peptide LPVAGDGGLVCPYMEFFKNENNELPK identified with mass spectrometry relative to the interface regions of IL1β-IL1R1 complex.

| AA | A           | B           | Y           |
|----|-------------|-------------|-------------|
| I  | 86.09642579 | 114.0913404 | -           |
| P  | 183.1491896 | 211.1441043 | 954.5982434 |
| V  | 282.2176035 | 310.2125182 | 857.5454795 |
| A  | 353.2547173 | 381.2496319 | 758.4770656 |
| L  | 466.3387813 | 494.3336959 | 687.4399519 |
| G  | 523.360245  | 551.3551596 | 574.3558879 |
| L  | 636.444309  | 664.4392236 | 517.3344242 |
| K  | 764.539272  | 792.5341866 | 404.2503602 |
| E  | 893.581865  | 921.5767797 | 276.1553972 |
| K  | -           | -           | 147.1128041 |

Interface residue: IL1 $\beta$  Lys55

Peptide: IPVALGLKEK

Precursor ion 534.34576

Charge 2

Scan 1739

P(pep) 2.3E-5

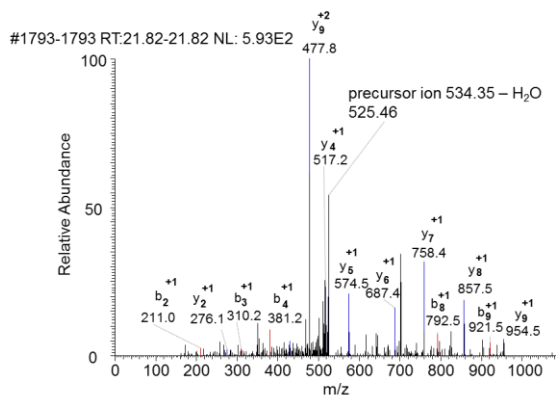

Supplementary Figure 14 | Peptide IPVALGLKEK identified with mass spectrometry relative to the interface regions of IL1 $\beta$ -IL1RI complex.

| AA | A           | B           | Y           |
|----|-------------|-------------|-------------|
| S  | 60.04439023 | 88.03930485 | -           |
| L  | 173.1284542 | 201.1233688 | 1362.679455 |
| N  | 287.1713816 | 315.1662963 | 1249.595391 |
| C  | 447.2020616 | 475.1969763 | 1135.552464 |
| T  | 548.2497401 | 576.2446547 | 975.521784  |
| L  | 661.3338041 | 689.3287187 | 874.4741055 |
| R  | 817.4349151 | 845.4298297 | 761.3900416 |
| D  | 932.4618581 | 960.4567727 | 605.2889306 |
| S  | 1019.493886 | 1047.488801 | 490.2619875 |
| Q  | 1147.552464 | 1175.547379 | 403.2299591 |
| Q  | 1275.611041 | 1303.605956 | 275.1713816 |
| K  | -           | -           | 147.1128041 |

Interface residues: IL1 $\beta$  Arg4-Lys16  
 Peptide: SLNCTLRDSQQK  
 Precursor ion 725.37238  
 Charge 2  
 Scan 946  
 P(pep) 9.1E-8

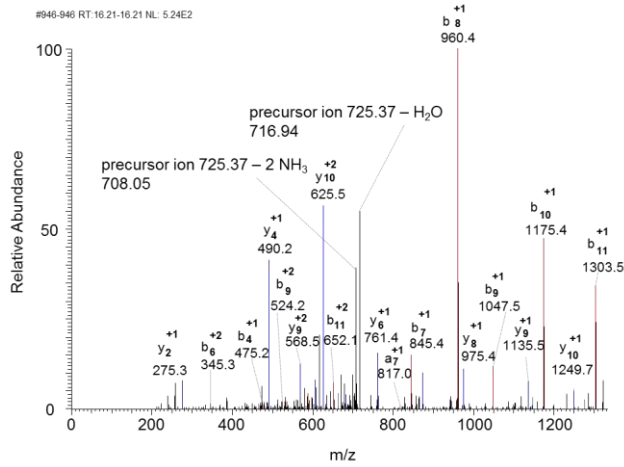

Supplementary Figure 15 | Peptide SLNCTLRDSQQK identified with mass spectrometry relative to the interface regions of IL1 $\beta$ -IL1RI complex.

| AA | A           | B           | Y           |
|----|-------------|-------------|-------------|
| I  | 86.09642579 | 114.0913404 | -           |
| E  | 215.1390189 | 243.1339335 | 3889.874167 |
| I  | 328.2230828 | 356.2179975 | 3760.831573 |
| N  | 442.2660103 | 470.2609249 | 3647.74751  |
| N  | 556.3089377 | 584.3038523 | 3533.704582 |
| K  | 684.4039007 | 712.3988153 | 3419.661655 |
| L  | 797.4879647 | 825.4828793 | 3291.566692 |
| E  | 926.5305578 | 954.5254724 | 3178.482628 |
| F  | 1073.598972 | 1101.593886 | 3049.440035 |
| E  | 1202.641565 | 1230.636479 | 2902.371621 |
| S  | 1289.673593 | 1317.668508 | 2773.329028 |
| A  | 1360.710707 | 1388.705622 | 2686.296999 |
| Q  | 1488.769284 | 1516.764199 | 2615.259885 |
| F  | 1635.837698 | 1663.832613 | 2487.201308 |
| P  | 1732.890462 | 1760.885377 | 2340.132894 |
| N  | 1846.93339  | 1874.928304 | 2243.08013  |
| W  | 2033.012703 | 2061.007617 | 2129.037203 |
| Y  | 2196.076031 | 2224.070946 | 1942.95789  |
| I  | 2309.160095 | 2337.15501  | 1779.894561 |
| S  | 2396.192123 | 2424.187038 | 1666.810497 |
| T  | 2497.239802 | 2525.234716 | 1579.778469 |
| S  | 2584.27183  | 2612.266745 | 1478.73079  |
| Q  | 2712.330408 | 2740.325322 | 1391.698762 |
| A  | 2783.367522 | 2811.362436 | 1263.640185 |
| E  | 2912.410115 | 2940.405029 | 1192.803071 |
| N  | 3026.453042 | 3054.447957 | 1063.560478 |
| M  | 3157.493527 | 3185.488441 | 949.5175503 |
| P  | 3254.546291 | 3282.541205 | 818.4770656 |
| V  | 3353.614704 | 3381.609619 | 721.4243018 |
| F  | 3500.683118 | 3528.678033 | 622.3558879 |
| L  | 3613.767182 | 3641.762097 | 475.287474  |
| G  | 3670.788646 | 3698.783561 | 362.20341   |
| G  | 3727.81011  | 3755.805024 | 305.1819463 |
| T  | 3828.857788 | 3856.852703 | 248.1604826 |
| K  | -           | -           | 147.1128041 |

Interface residue: IL1β Lys103

Peptide:  
 IEINNKLEFESAQFPNWIYSTSQAENMPVFLGGTK  
 Precursor ion 1334.99622  
 Charge 3  
 Scan 3944  
 P(pep) 1.5E-12

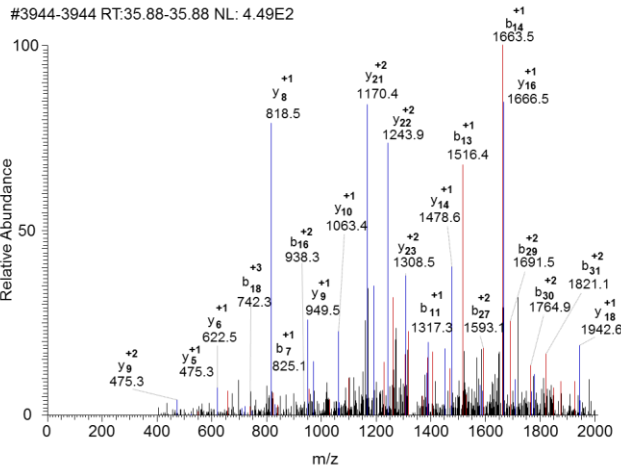

Supplementary Figure 16 | Peptide IEINNKLEFESAQFPNWIYSTSQAENMPVFLGGTK identified with mass spectrometry relative to the interface regions of IL1β-IL1RI complex.



| AA | A           | B           | Y           |
|----|-------------|-------------|-------------|
| L  | 86.09642579 | 114.0913404 | -           |
| E  | 215.1390189 | 243.1339335 | 3178.482628 |
| F  | 362.2074328 | 390.2023474 | 3049.440035 |
| E  | 491.2500259 | 519.2449405 | 2902.371621 |
| S  | 578.2820543 | 606.2769689 | 2773.329028 |
| A  | 649.319168  | 677.3140827 | 2686.296999 |
| Q  | 777.3777455 | 805.3726602 | 2615.259885 |
| F  | 924.4461594 | 952.4410741 | 2487.201308 |
| P  | 1021.498923 | 1049.493838 | 2340.132894 |
| N  | 1135.541851 | 1163.536765 | 2243.08013  |
| W  | 1321.621164 | 1349.616078 | 2129.037203 |
| Y  | 1484.684492 | 1512.679407 | 1942.95789  |
| I  | 1597.768556 | 1625.763471 | 1779.894561 |
| S  | 1684.800585 | 1712.795499 | 1666.810497 |
| T  | 1785.848263 | 1813.843178 | 1579.778469 |
| S  | 1872.880291 | 1900.875206 | 1478.73079  |
| Q  | 2000.938869 | 2028.933784 | 1391.698762 |
| A  | 2071.975983 | 2099.970897 | 1263.640185 |
| E  | 2201.018576 | 2229.01349  | 1192.603071 |
| N  | 2315.061503 | 2343.056418 | 1063.560478 |
| M  | 2446.101988 | 2474.096902 | 949.5175503 |
| P  | 2543.154752 | 2571.149666 | 818.4770656 |
| V  | 2642.223166 | 2670.21808  | 721.4243018 |
| F  | 2789.291579 | 2817.286494 | 622.3558879 |
| L  | 2902.375643 | 2930.370558 | 475.287474  |
| G  | 2959.397107 | 2987.392022 | 362.20341   |
| G  | 3016.418571 | 3044.413485 | 305.1819463 |
| T  | 3117.466249 | 3145.461164 | 248.1604826 |
| K  | -           | -           | 147.1128041 |

Interface residue: IL1 $\beta$  Lys109

Peptide LEFESAQFPNWWYISTSQAENMPVFLGGTK

Precursor ion 1097.86499

Charge 3

Scan 4037

P(pep) 4.1E-13

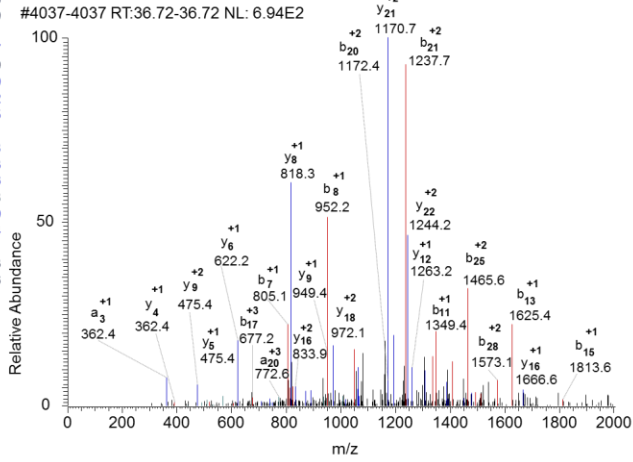

Supplementary Figure 17 | Peptide LEFESAQFPNWWYISTSQAENMPVFLGGTK identified with mass spectrometry relative to the interface regions of IL1 $\beta$ -IL1RI complex.

| AA | A           | B           | Y           |
|----|-------------|-------------|-------------|
| D  | 88.03930485 | 116.0342195 | -           |
| S  | 175.0713333 | 203.0662479 | 1694.878183 |
| Q  | 303.1299108 | 331.1248254 | 1607.846155 |
| Q  | 431.1884883 | 459.1834029 | 1479.787577 |
| K  | 559.2834513 | 587.2783659 | 1351.729    |
| S  | 646.3154797 | 674.3103943 | 1223.634037 |
| L  | 759.3995436 | 787.3944582 | 1136.602008 |
| V  | 858.4679575 | 886.4628721 | 1023.517944 |
| M  | 989.5084421 | 1017.503357 | 924.4495303 |
| S  | 1076.540471 | 1104.535385 | 793.4090457 |
| G  | 1133.561934 | 1161.556849 | 706.3770173 |
| P  | 1230.614698 | 1258.609613 | 649.3555535 |
| Y  | 1393.678027 | 1421.672941 | 552.3027897 |
| E  | 1522.72062  | 1550.715534 | 389.2394612 |
| L  | 1635.804684 | 1663.799598 | 260.1968681 |
| K  | -           | -           | 147.1128041 |

Interface residues: IL1 $\beta$  Arg11-Lys27  
 Peptide DSQQKSLVMSGPYELK  
 Precursor ion 905.46307  
 Charge 2  
 Scan 1520  
 P(pep) 1.2E-11

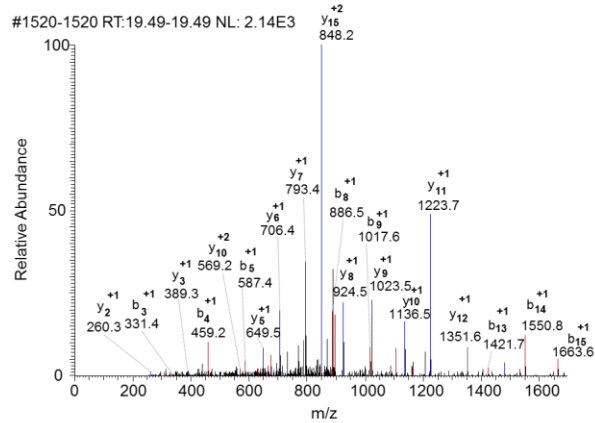

Supplementary Figure 18 | Peptide DSQQKSLVMSGPYELK identified with mass spectrometry relative to the interface regions of IL1 $\beta$ -IL1RI complex.

| AA | A           | B           | Y           |
|----|-------------|-------------|-------------|
| T  | 74.0604029  | 102.0549549 | -           |
| E  | 203.1026334 | 231.097548  | 1432.764199 |
| D  | 318.1295764 | 346.124491  | 1303.721606 |
| E  | 447.1721695 | 475.1670841 | 1188.694663 |
| T  | 548.2198479 | 576.2147626 | 1059.65207  |
| R  | 704.320959  | 732.3158736 | 958.6043914 |
| T  | 805.3686374 | 833.363552  | 802.5032804 |
| Q  | 933.4272149 | 961.4221295 | 701.4556019 |
| I  | 1046.511279 | 1074.506193 | 573.3970244 |
| L  | 1159.595343 | 1187.590257 | 460.3129605 |
| S  | 1246.627371 | 1274.622286 | 347.2288965 |
| I  | 1359.711435 | 1387.70635  | 260.1968681 |
| K  |             | -           | 147.1128041 |

Hotspot residue: IL1RacP Arg286

Peptide: TEDETRTQILSIK

Precursor ion 767.40955

Charge 2

P(pep) 7.2E-5

scan 1492

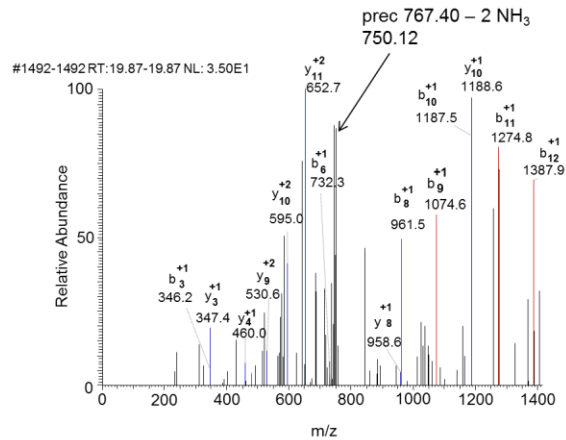

**Supplementary Figure 19 | Arg286 peptide mass spectrometry sequence.** IL1RacP peptide identified by protein painting followed by mass spectrometry relative to the closest proximity hot spot in the IL1 $\beta$ -IL1RI-IL1RacP complex. Protein painting revealed this single region as an interaction point incorporating an arginine at the outermost bend of the beta loop and was predicted to participate both in hydrogen bonding and salt bridge formation between the accessory protein and the receptor-ligand complex. This peptide was used to generate Arg 286 peptide inhibitor and was also used as the antigen for Arg286 pep monoclonal antibody production (Fig. 6).

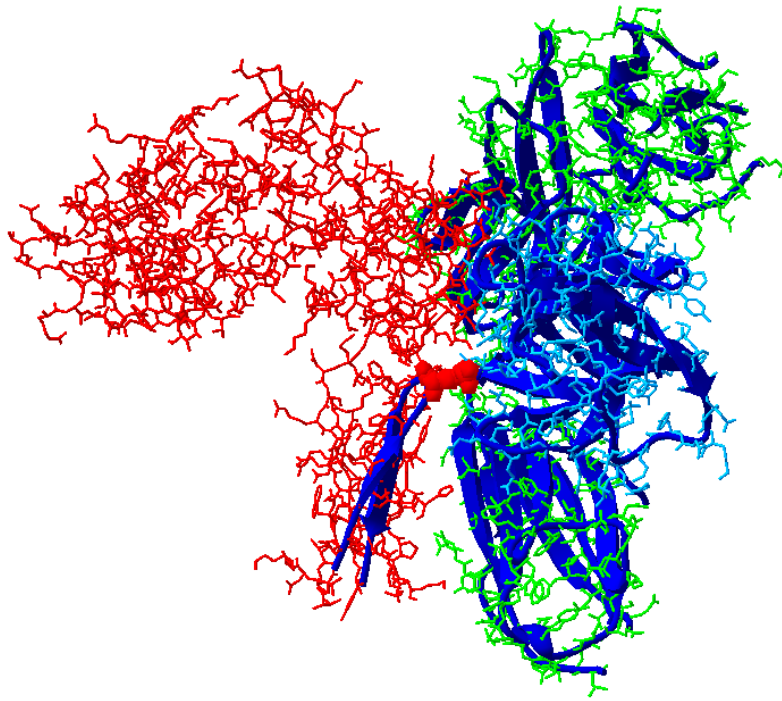

**Supplementary Figure 20 | Arg286 peptide 3D model.** Arg 286 peptide is represented as a ribbon structure in the context of the ternary complex. Arg286 amino acid is represented by solid spheres. IL1RAcP is depicted in the red backbone.

|                               |     |                     |                       |     |
|-------------------------------|-----|---------------------|-----------------------|-----|
| Arg286 pep                    | 1   | T I N E S I S H S R | T E D E T R T Q I L S | 21  |
| Homo sapiens                  | 156 | T I N E S I S H S R | T E D E T R T Q I L S | 176 |
| Macaca mulatta                | 297 | T I N E S I S H S R | T E D E T R T Q I L S | 317 |
| Pongo abelii                  | 297 | T I N E S I S H S R | T E D E T R T Q I L S | 317 |
| Callithrix jacchus            | 297 | T I N E S I S H S R | T E D E T R T Q I L S | 317 |
| Pan troglodytes               | 297 | T I N E S I S H S R | T E D E T R T Q I L S | 317 |
| Gorilla gorilla               | 294 | T I N E S I S H S R | T E D E T R T Q I L S | 314 |
| Nomascus leucogenys           | 297 | T I N E S I S H S R | T E D E T R T Q I L S | 317 |
| Spermophilus tridecemlineatus | 298 | T I N E S I S Y T K | T E D E T R T Q I L S | 318 |
| Rattus norvegicus             | 156 | T I N E S V S Y S S | T E D E T R T Q I L S | 176 |
| Mus musculus                  | 297 | T I N E S V S Y S S | T E D E T R T Q I L S | 317 |
| Otolemur garnettii            | 290 | T I N E S I S L T R | T E D E M R T Q I L S | 309 |
| Mustela putorius              | 62  | T V N E S I S L T Q | T E D E T R T Q I L N | 82  |
| Oryctolagus cuniculus         | 296 | T I N E S L S Y S K | T E D E T R T H V L S | 316 |
| Felis catus                   | 299 | T V N E S I S L T T | T E D E T R T Q V L S | 319 |
| Sus scrofa                    | 295 | S I N E S V S L S K | I E D E T R T Q L L S | 315 |
| Cricetulus griseus            | 298 | T T N E S V S Y S T | T E D E T R T Q I L S | 317 |
| Heterocephalus glaber         | 297 | T I S E S T S Y S K | T E D E T R T Q V L S | 317 |
| Pteropus alecto               | 465 | T I N E S V S Q T K | T E D E K R T Q V L S | 484 |
| Canis familiaris              | 299 | T V N E S V S L T A | T E D E M R T Q I L N | 319 |
| Cavia porcellus               | 293 | T I S E S A S Y S T | M E D E T R T Q V L S | 313 |
| Bos taurus                    | 297 | S V N E S V I L K V | T E D E T R T Q L L S | 317 |

**Supplementary Figure 21 | Arg286 peptide sequence conserved in evolution.** Sequence of Arg286 peptide found by protein painting is compared among species. Identical residues are shown in dark green. This peptide sequence is conserved in evolution reflecting its important functional role<sup>3</sup>. The numbers flanking the sequences are those provided by BLASTp software.

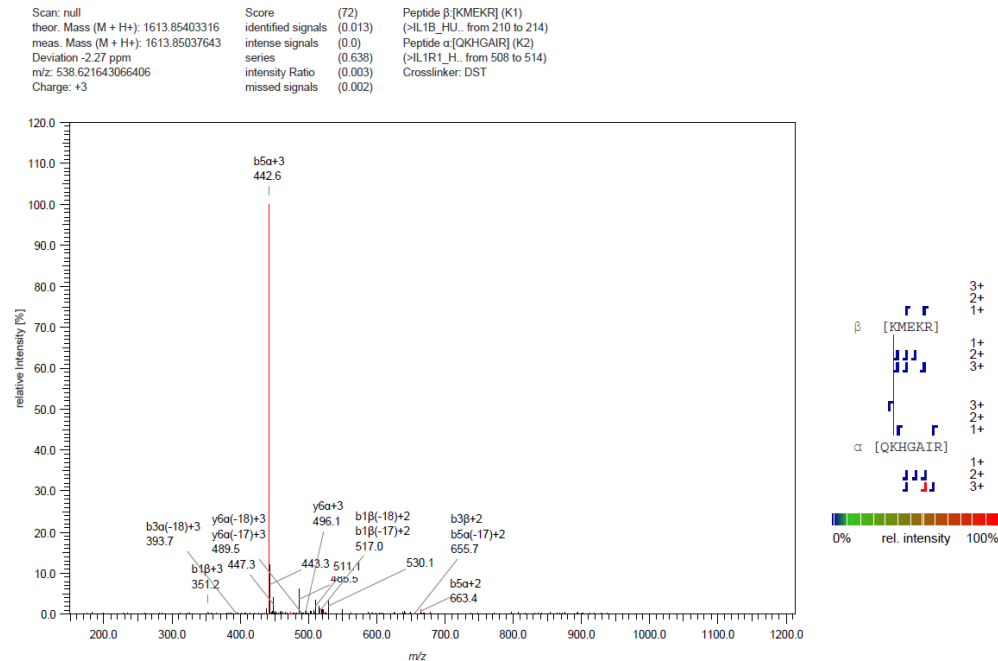

**Supplementary Figure 22 | Experimental spectrum obtained with the crosslinking method applied to the 3-way IL1 $\beta$  complex.** DST and sulfo-EGS were used to form covalent crosslinks in the pre-formed IL1 $\beta$ -IL1RI-IL1RAcP complex. The cross linking reactions was allowed to proceed for 30 and 120 minutes (2 crosslinkers  $\times$  2 time periods = 4 conditions). Proteins were denatured, trypsin digested, desalted and analyzed with mass spectrometry (See Methods section). Data analysis was performed with StavroX<sup>4</sup>. Cross-link identifications were filtered by requiring a score > 20. Experimental spectrum obtained for cross-linked peptide 1 listed in Supplementary Table 8.

Scan: null  
 theor. Mass (M + H<sup>+</sup>): 2615.35628699  
 meas. Mass (M + H<sup>+</sup>): 2615.35782272  
 Deviation 0.59 ppm  
 m/z: 872.457458496094  
 Charge: +3

Score (38)  
 identified signals (0.568)  
 intense signals (0.002)  
 series (0.195)  
 intensity Ratio (0.174)  
 missed signals (0.762)

Peptide β: [GEVAKAAK] (K8)  
 (>IL1AP\_H\_ from 338 to 345)  
 Peptide α: [PTLQLESVDPKKNYPK] (K11)  
 (>IL1B\_HU\_ from 194 to 208)  
 Crosslinker: DST

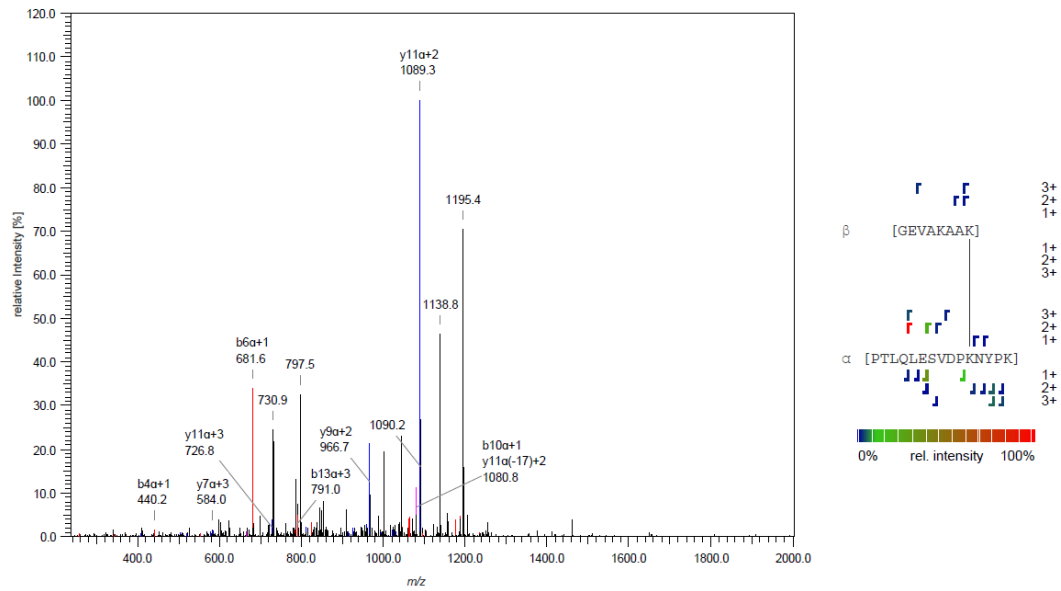

**Supplementary Figure 23 | Experimental spectrum obtained with the crosslinking method applied to the 3-way IL1 $\beta$  complex.** Experimental spectrum obtained for cross-linked peptide 2 listed in Supplementary Table 8.

|                                                  |                            |                                           |
|--------------------------------------------------|----------------------------|-------------------------------------------|
| Scan: null                                       | Score (20)                 | Peptide $\beta$ [SAKGEVAK] (K3)           |
| theor. Mass (M + H <sup>+</sup> ): 2631.35120159 | identified signals (0.491) | (>IL1AP_H.. from 335 to 342)              |
| meas. Mass (M + H <sup>+</sup> ): 2631.34622604  | intense signals (0.734)    | Peptide $\alpha$ [PTLQLESVDPKKNYPK] (K11) |
| Deviation -1.89 ppm                              | series (0.031)             | (>IL1B_HU.. from 194 to 208)              |
| m/z: 877.786926269531                            | intensity Ratio (0.691)    | Crosslinker: DST                          |
| Charge: +3                                       | missed signals (0.827)     |                                           |

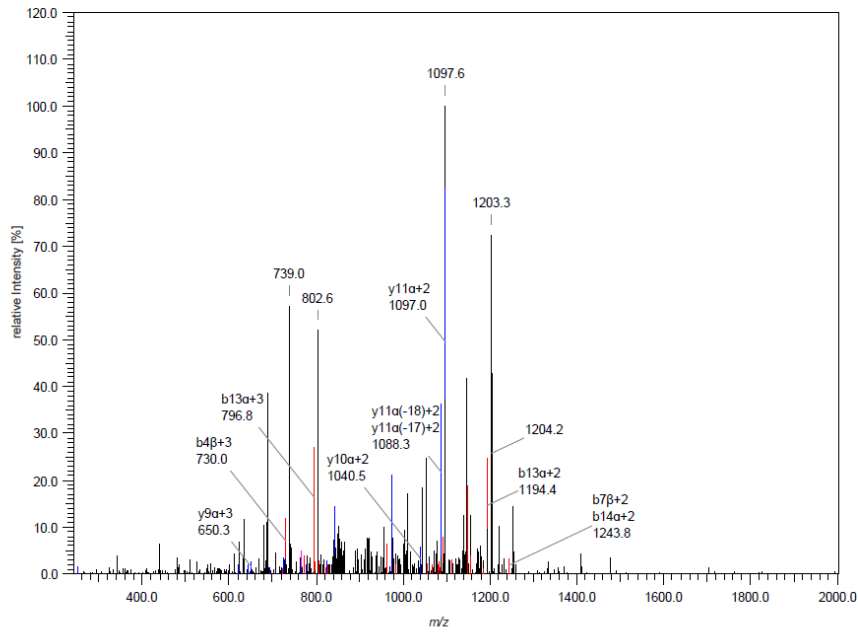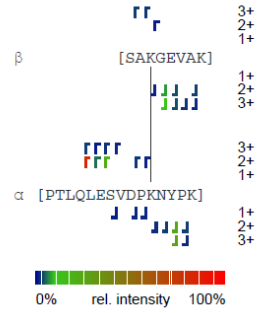

**Supplementary Figure 24 | Experimental spectrum obtained with the crosslinking method applied to the 3-way IL1 $\beta$  complex.** Experimental spectrum obtained for cross-linked peptide 3 listed in Supplementary Table 8.



Scan: null  
 theor. Mass (M + H+): 1751.84800414  
 meas. Mass (M + H+): 1751.84305222  
 Deviation -2.83 ppm  
 m/z: 584.619201660156  
 Charge: +3

Score (58)  
 identified signals (0.104)  
 intense signals (0.005)  
 series (0.45)  
 intensity Ratio (0.452)  
 missed signals (0.01)

Peptide  $\beta$ : [mEKQR] (K3)  
 (>IL1 $\beta$ \_HU... from 211 to 214)  
 Peptide  $\alpha$ : [VTSEDLKQR] (K7)  
 (>IL1AP\_H... from 320 to 327)  
 Crosslinker: sulfoECS

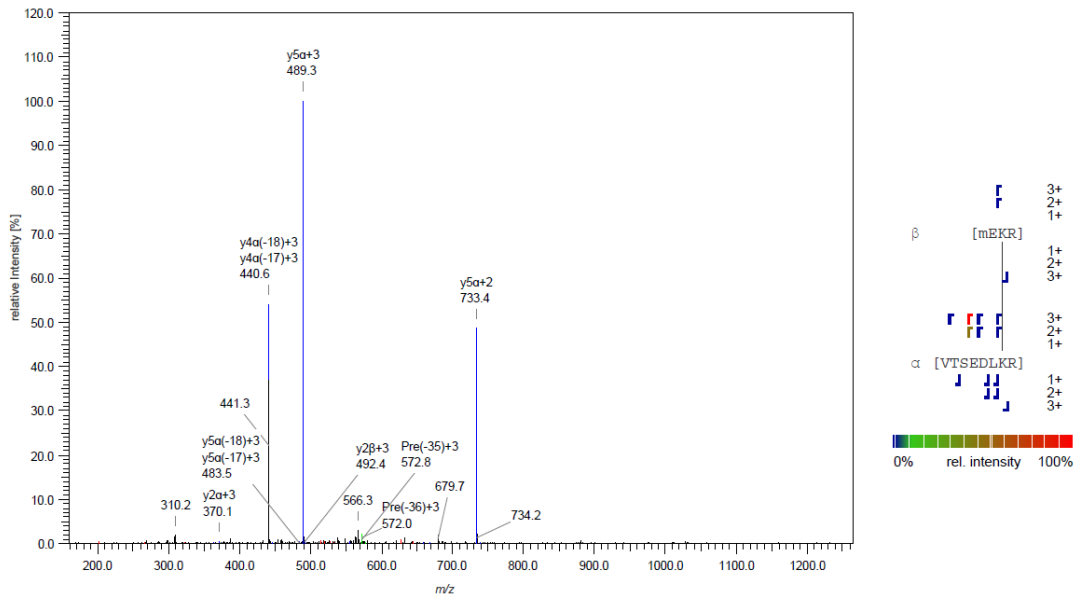

**Supplementary Figure 25 | Experimental spectrum obtained with the crosslinking method applied to the 3-way IL1 $\beta$  complex.** Experimental spectrum obtained for cross-linked peptide 4 listed in Supplementary Table 8.

|                                                  |                    |         |                                  |
|--------------------------------------------------|--------------------|---------|----------------------------------|
| Scan: null                                       | Score              | (28)    | Peptide $\beta$ : [VKQK] (K2)    |
| theor. Mass (M + H <sup>+</sup> ): 1322.70996045 | identified signals | (0.194) | (>IL1AP_HL_ from 348 to 349)     |
| meas. Mass (M + H <sup>+</sup> ): 1322.71147362  | intense signals    | (0.01)  | Peptide $\alpha$ : [KmEKRR] (K4) |
| Deviation 1.37 ppm                               | series             | (0.878) | (>IL1B_HU_ from 210 to 214)      |
| m/z: 601.859375                                  | intensity Ratio    | (0.062) | Crosslinker: DST                 |
| Charge: +2                                       | missed signals     | (0.657) |                                  |

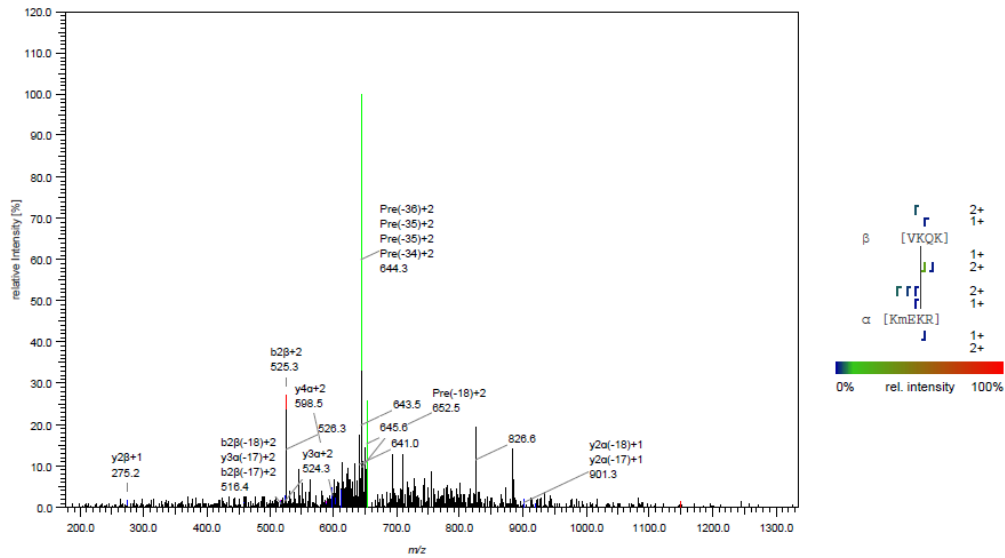

**Supplementary Figure 26 | Experimental spectrum obtained with the crosslinking method applied to the 3-way IL1 $\beta$  complex.** Experimental spectrum obtained for cross-linked peptide 5 listed in Supplementary Table 8.

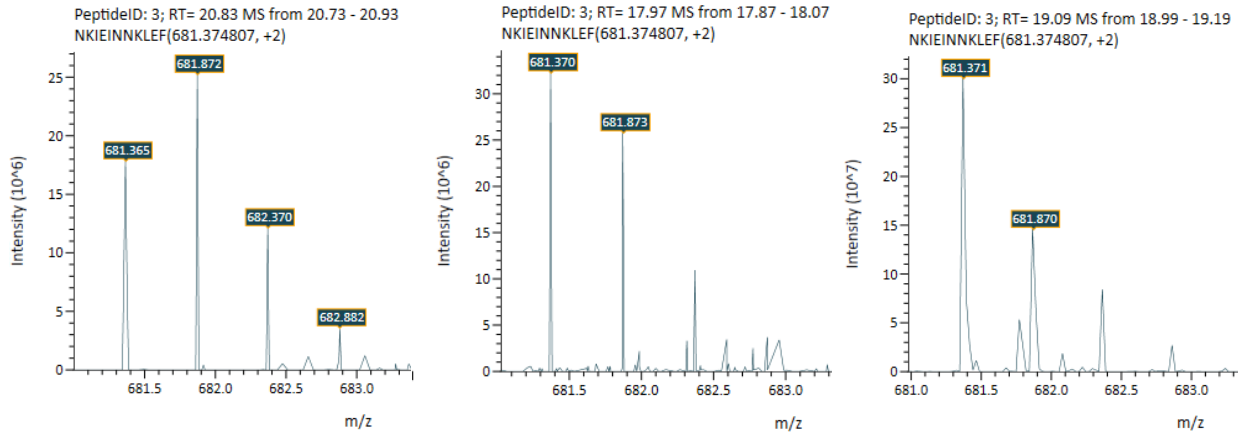

**Supplementary Figure 27 | Results of the hydrogen/deuterium exchange method applied to the 3-way IL1 $\beta$  complex.** Deuterium off-exchange experiments were performed on the 3-way IL1 $\beta$  complex (see Methods section). Example mass spectra of the NKIEINNKLEF peptic fragments (IL1 $\beta$ ) in the unbound, bound and unlabeled condition from left to right.

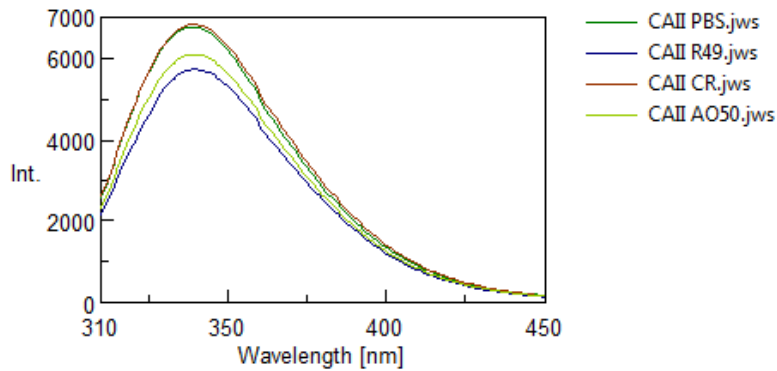

**Supplementary Figure 28 | Fluorescence emission spectra of CA bound to different dyes show no shift in the maximum peak with respect to CA in PBS.** A solution of 10 mM CA in PBS was subjected to fluorescence spectroscopy. Intrinsic protein fluorescence is due to aromatic amino acids, predominantly tryptophan. The excitation wavelength ( $\lambda_{ex}$ ) was set at 295 nm because at this wavelength there is no absorption by tyrosine. The emission spectrum was recorded with Jasco Spectrofluorometer FP-8300 and analyzed with Jasco Spectra Manager Version 2. The emission spectra ( $\lambda_{ex} = 295\text{nm}$ ) was recorded for CA pulsed for 5 minutes with the following example dyes: R49, CR, AO50 and immediately passed through Sephadex columns in order to eliminate unbound dye (Supplementary Figure 5). No shift in the maximum emission peak (340 nm) was evident. This suggests that solvent accessibility of (7) tryptophan residues in CA is not modified. Therefore no modification in the three dimensional conformation (involving tryptophan residues) of the protein occurs after a short pulse of dyes.

**Supplementary Table 1: Paint molecules selected for their low dissociation rate with CA and the capability to remain bound to CA after denaturation, reduction and alkylation**

|   | Chemical Name (abbreviation)                                                                                                | MW      | $k_{\text{off}}$ [ $10^{-5} \text{ s}^{-1}$ ] | Bound after CA reduction and alkylation | Water soluble |
|---|-----------------------------------------------------------------------------------------------------------------------------|---------|-----------------------------------------------|-----------------------------------------|---------------|
| 1 | sodium 4-(4-(benzyl-et-amino)-ph-azo)-2,5-di-cl-benzenesulfonate (AO50)                                                     | 486.356 | 5.725                                         | Y                                       | Y             |
| 2 | disodium;1-amino-9, 10-dioxo-4-[3-(2-sulfonatooxyethylsulfonyl)anilino]anthracene-2-sulfonate (RBB)                         | 626.54  | 3.222                                         | Y                                       | Y             |
| 3 | phenyl 4-[(1-amino-4-hydroxy-9,10-dioxo-9,10-dihydro-2-anthracenyl)oxy]benzenesulfonate (R49)                               | 487.492 | 5.899                                         | Y                                       | Y             |
| 4 | disodium;4-amino-3-[[4-[4-[(1-amino-4-sulfonatonaphthalen-2-yl)diazenyl]phenyl]phenyl]diazenyl]naphthalene-1-sulfonate (CR) | 696.66  | 2.538                                         | Y                                       | Y             |

Chemical properties of the paint molecules, including chemical name, molecular weight, dissociation rate, capability to remain bound to CA after reduction and alkylation, solubility in water for selected paint molecules. Selection criteria for paint molecules include:  $k_{\text{off}} < 6 \cdot 10^{-5} \text{ s}^{-1}$ , water soluble = yes, survives to reduction and alkylation = yes. These dyes have not been previously explored for protein binding kinetics and protein cleavage site blockage.

**Supplementary Table 2 : Small molecule molecular “paints” screened for use in protein painting methodology.**

| Class             | CAS number | Name                                                                                                                 | Formula                                                                               |
|-------------------|------------|----------------------------------------------------------------------------------------------------------------------|---------------------------------------------------------------------------------------|
| Anthraquinone     | 5517-38-4  | phenyl 4-[(1-amino-4-hydroxy-9,10-dioxo-9,10-dihydro-2-anthracenyl)oxy]benzenesulfonate                              | 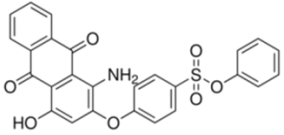   |
| Anthraquinone     | 1390-65-4  | 3,5,6,8-tetrahydroxy-1-methyl-9,10-dioxo-7-[3,4,5-trihydroxy-6-(hydroxymethyl)oxan-2-yl]anthracene-2-carboxylic acid |    |
| Anthraquinone     | 2580-78-1  | disodium;1-amino-9, 10-dioxo-4-[3-(2-sulfonatooxyethylsulfonyl)anilino]anthracene-2-sulfonate                        |    |
| Aryl azo compound | 10214-07-0 | Sodium 4-(4-(benzyl-ethyl-amino)-ph-azo)-2,5-dichlorobenzenesulfonate                                                |   |
| Aryl azo compound | 68806-22-4 | Sodium 4-[(4-methoxy-1-naphthyl)diazenyl]benzenesulfonate                                                            |  |
| Aryl azo compound | 573-58-0   | disodium;4-amino-3-[[4-[4-[(1-amino-4-sulfonatophthalen-2-yl)diazenyl]phenyl]phenyl]diazenyl]naphthalene-1-sulfonate |  |
| Aryl azo compound | 1936-15-8  | 7-Hydroxy-8-phenylazo-1,3-naphthalenedisulfonic acid disodium salt                                                   |  |
| Xanthene          | 2321-07-5  | 3',6'-dihydroxy-Spiro[isobenzofuran-1(3H),9'-[9H]xanthen]-3-one                                                      |  |
| Xanthene          | 92-83-1    | Xanthene                                                                                                             |  |

|                         |            |                                                                                                                            |                                                                                       |
|-------------------------|------------|----------------------------------------------------------------------------------------------------------------------------|---------------------------------------------------------------------------------------|
| Xanthene                | 548-24-3   | 4',5'-dibromo-3',6'-dihydroxy-2',7'-dinitro-spiro[isobenzofuran-1(3H),9'-[9H]xanthen]-3-one                                | 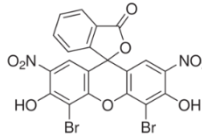   |
| Thiazine                | 531-53-3   | 3-amino-7-(dimethylamino)-Phenothiazin-5-ium, chloride                                                                     |    |
| Triarylmethane compound | 8004-87-3  | N-(4-{bis[4-(dimethylamino)phenyl]methylene}-2,5-cyclohexadien-1-ylidene)methanaminium chloride                            |    |
| Triarylmethane compound | 28983-56-4 | [[4-[bis[4-(sulfophenyl)amino]phenyl]methylene]-2,5-cyclohexadien-1-ylidene]amino]-Benzenesulfonic acid, sodium salt (1:2) |    |
| Triarylmethane compound | 3244-88-0  | 2-amino-5-[[4-(4-amino-3-sulfo-2,5-cyclohexadien-1-ylidene)methyl]-3-methyl-Benzenesulfonic acid, sodium salt              |   |
| Polymethine compound    | 905-97-5   | 3,3'-Diethylthiacarbocyanine iodide                                                                                        |  |
| Polymethine compound    | 23302-83-2 | 4-[2-(1-methyl-4(1H)-pyridinylidene)ethylidene]-2,5-Cyclohexadien-1-one,                                                   |  |
| Polymethine compound    | 2768-90-3  | (2E)-1-ethyl-2-[(E)-3-(1-ethylquinolin-1-ium-2-yl)prop-2-enylidene] quinoline; chloride                                    |  |
| Polymethine compound    | 4727-49-5  | 1,1'-Diethyl-4,4'-cyanine iodide                                                                                           |  |
| Polymethine compound    | 514-73-8   | 3-Ethyl-2-[5-(3-ethyl-2(3H)-benzothiazolylidene)-1,3-pentadienyl]benzothiazolium iodide                                    |  |

|                        |            |                                                                      |                                                                                     |
|------------------------|------------|----------------------------------------------------------------------|-------------------------------------------------------------------------------------|
| Polymethine compound   |            | Copper(II) phthalocyanine-tetrasulfonic acid tetrasodium salt        | 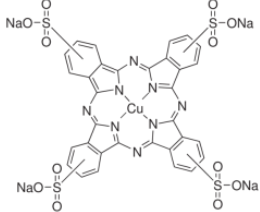 |
| Naphthalene derivative | 82-76-8    | 8-Anilino-1-naphthalenesulfonic acid                                 |  |
| Naphthalene derivative | 65664-81-5 | 4,4'-Dianilino-1,1'-binaphthyl-5,5'-disulfonic acid dipotassium salt |  |
| Heterocyclic compound  | 2390-54-7  | Thioflavine T                                                        |  |
| Heterocyclic compound  | 2390-54-7  | 2-[4-(dimethylamino)phenyl]-3,6-dimethyl-Benzothiazolium, chloride   |  |

Class, CAS number, name and molecular formula are shown. All molecular paints were purchased from Sigma except compounds CAS 514-73-8 and 8004-87-3 which were purchased from Fisher and CAS 2580-78-1 which was purchased from Acros Organics. Binding mechanisms involve hydrophobic and electrostatic forces<sup>5</sup>. Small molecular paints may preferentially recognize charged amino acids<sup>6</sup> predominantly found on the surface of proteins and are essential to trypsin cleavage sites. Small molecular “paints” can insert aromatic rings into non-polar hydrophobic pockets of the protein surface, while the flanking portions of the dye and protein molecules can re-arrange depending on energy constraints<sup>5</sup>. A variety of chemical classes (first column) were ranked for utility as molecular paints based on the following criteria using the workflow described in Supplementary Table 1: a) extremely rapid on-rates ( $M^{-1} \text{ sec}^{-1}$ ) and very slow off-rates ( $\text{sec}^{-1}$ ), b) remain bound following protein dissociation or denaturation with 2 M urea, and c) bind to multiple sites on the exposed protein surface to achieve full coverage of all the trypsin cleavage sites.



**Supplementary Table 3: Contingency table comparing protein painting positives to Robetta hotspot energy prediction model.**

|       | Robetta +      | Robetta -      | Total |      |                              |
|-------|----------------|----------------|-------|------|------------------------------|
| PP +  | 8              | 2              | 10    | 0.8  | PP Precision                 |
| PP -  | 9              | 63             | 72    | 0.88 | PP Negative predictive value |
| Total | 17             | 65             | 82    |      |                              |
|       | 0.47           | 0.97           |       |      |                              |
|       | PP Sensitivity | PP Specificity |       |      |                              |

Agreement was considered in the case a positive proteolytic fragment identified with protein painting contained a hotspot residue predicted by Robetta. PP+ = protein painting positive, PP- = protein painting negative, Robetta + = interface residue with  $\Delta\Delta G \geq 1.0 \text{ kcal mol}^{-1}$  = hotspot. Robetta - = interface residue with  $\Delta\Delta G < 1.0 \text{ kcal mol}^{-1}$  = not a hotspot. Accuracy, calculated as  $TP+TN/(TP+TN+FP+FN)$ , is 87%.

**Supplementary Table 4: Contingency table comparing protein painting positives to KFC2 hotspot energy predictions**

|       | KFC2 +         | KFC2 -         | Total |      |                              |
|-------|----------------|----------------|-------|------|------------------------------|
| PP +  | 9              | 1              | 10    | 0.90 | PP Precision                 |
| PP -  | 10             | 62             | 72    | 0.86 | PP Negative predictive value |
| Total | 19             | 63             | 82    |      |                              |
|       | 0.47           | 0.98           |       |      |                              |
|       | PP Sensitivity | PP Specificity |       |      |                              |

Agreement was considered in the case a positive proteolytic fragment identified with protein painting contained a hotspot residue predicted by KFC2. PP+ = protein painting positive, PP- = protein painting negative, KFC2 + = interface residue predicted to be hotspot by the model. KFC2 - = interface residue predicted not to be a hotspot by the model.

**Supplementary Table 5: Contingency table comparing protein painting positives to Hotpoint hotspot energy prediction model.**

|       | Hotpoint +     | Hotpoint -     | Total |      |                              |
|-------|----------------|----------------|-------|------|------------------------------|
| PP +  | 8              | 2              | 10    | 0.8  | PP Precision                 |
| PP -  | 9              | 63             | 72    | 0.88 | PP Negative predictive value |
| Total | 17             | 65             | 82    |      |                              |
|       | 0.47           | 0.97           |       |      |                              |
|       | PP Sensitivity | PP Specificity |       |      |                              |

Agreement was considered in the case a positive proteolytic fragment identified with protein painting contained a hotspot residue predicted by Hotpoint. PP+ = protein painting positive, PP- = protein painting negative, Hotpoint + = interface residue predicted to be hotspot by the model. Hotpoint - = interface residue predicted not to be a hotspot by the model.

**Supplementary Table 6: Output of Robetta, KFC2 and Hotpoint prediction methods. Interface residue count is reported for Hotspot and non hotspots.**

|             | Robetta | KFC2 | Hotpoint |
|-------------|---------|------|----------|
| Hotspot     | 32      | 49   | 40       |
| Non Hotspot | 95      | 125  | 63       |
| Total       | 127     | 250  | 103      |

Total residues belonging to the interface according to PDBePISA (PDB# 4DEP) = 202

**Supplementary Table 7: Contingency table comparing protein painting positives to hotspots common to Robetta, Hotspot and KFC2.**

|       | Software +     | Software -     | Total |      |                              |
|-------|----------------|----------------|-------|------|------------------------------|
| PP +  | 5              | 5              | 10    | 0.50 | PP Precision                 |
| PP -  | 4              | 68             | 72    | 0.94 | PP Negative predictive value |
| Total | 9              | 73             | 82    |      |                              |
|       | 0.56           | 0.93           |       |      |                              |
|       | PP Sensitivity | PP Specificity |       |      |                              |

Agreement was considered in the case a positive proteolytic fragment identified with protein painting contained a hotspot residue predicted by Robetta, Hotspot and KFC2. PP+ = protein painting positive, PP- = protein painting negative, Software + = hotspot predicted by all three software. Software - = not a hotspot in at least one of the three prediction computational methods.

**Supplementary Table 8: Results of the crosslinking method applied to the 3-way IL1 $\beta$  complex.**

| Score | Hotspot | Peptides                                                   | Crosslink<br>ed amino<br>acid (I) | Crosslink<br>ed amino<br>acid (A) | m/z     | z | Mass<br>calc. | Dev(ppm) |
|-------|---------|------------------------------------------------------------|-----------------------------------|-----------------------------------|---------|---|---------------|----------|
| 72    | n       | mEKR(M95_R98) /<br>ISKEK(I72_K76)                          | K97                               | K74                               | 538.622 | 3 | 1613.854      | -2.27    |
| 38    | n       | PTLQLESVDPKNYPK<br>(P78-K92) /<br>GEVAKAAK (G319-<br>K326) | K88                               | K323                              | 872.457 | 3 | 2615.356      | 0.59     |
| 20    | n       | PTLQLESVDPKNYPK<br>(P78-K92) /<br>SAKGEVAK (S316-<br>K323) | K88                               | K318                              | 877.787 | 3 | 2631.351      | -1.89    |
| 58    | n       | mEKR (M95-R98) /<br>VTSEDLKR (V301-<br>R308)               | K97                               | K307                              | 584.619 | 3 | 1751.848      | -2.83    |
| 26    | n       | KmEKR (K94-R98) /<br>VKQK (V327-K330)                      | K97                               | K328                              | 661.859 | 2 | 1322.71       | 1.37     |

Five cross-linked peptide pairs were identified from the analysis of all experimental samples. (*Score*: StavroX score as defined in<sup>4</sup>, *Hotspot*: was any of the residues contained in the identified peptide predicted to be a hotspot by Robetta?, *Peptides*: identified peptide sequence, *Crosslinked amino acid (I)*: one letter code and pdb number of identified crosslinked amino acid in the interleukin 1 beta, *Crosslinked amino acid (A)*: one letter code and pdb number of identified crosslinked amino acid in the interleukin 1 receptor accessory protein, *m/z*: mass over charge ratio, *z*: charge, *Mass calc.*: calculated mass, *Dev(ppm)*: deviation from the calculated mass in ppm).

**Supplementary Table 9: Peptic fragments identified with pepsin digestion of unlabeled proteins and LTQ Orbitrap mass spectrometry analysis.**

| ProteinSource | Amino Acid Start | Amino Acid Stop | Sequence                | MonoisotopicMass | Z | RT    |
|---------------|------------------|-----------------|-------------------------|------------------|---|-------|
| IL1B          | 199              | 217             | ESVDPKNYPKKKMEKRFVF     | 2370.26385       | 2 | 15.62 |
| IL1B          | 250              | 262             | LGGTKGGQDITDF           | 1308.64302       | 2 | 17.26 |
| IL1B          | 218              | 228             | NKIEINNKLEF             | 1361.74234       | 2 | 19.04 |
| IL1B          | 163              | 176             | VQGEESENKIPVAL          | 1498.77476       | 2 | 19.27 |
| IL1B          | 163              | 183             | VQGEESENKIPVALGLKEKNL   | 2281.2398        | 3 | 19.3  |
| IL1B          | 143              | 158             | KALHLQGQDMEQQVVF        | 1870.94799       | 2 | 19.62 |
| IL1B          | 218              | 228             | NKIEINNKLEF             | 1361.74234       | 2 | 19.66 |
| IL1B          | 127              | 142             | RDSQQKSLVMSGPYEL        | 1837.91127       | 2 | 20.13 |
| IL1B          | 218              | 228             | NKIEINNKLEF             | 1361.74234       | 2 | 20.19 |
| IL1B          | 237              | 249             | YISTSQAENMPVF           | 1486.68826       | 2 | 21.97 |
| IL1B          | 163              | 178             | VQGEESENKIPVALGL        | 1668.88029       | 2 | 22    |
| IL1B          | 159              | 176             | SMSFVQGEESNDKIPVAL      | 1950.94772       | 2 | 23.16 |
| IL1B          | 227              | 236             | EFESAQFPNW              | 1254.54258       | 2 | 23.43 |
| IL1B          | 159              | 178             | SMSFVQGEESNDKIPVALGL    | 2137.04816       | 2 | 24.25 |
| IL1B          | 159              | 178             | SMSFVQGEESNDKIPVALGL    | 2121.05325       | 2 | 25.63 |
| IL1B          | 237              | 250             | YISTSQAENMPVFL          | 1599.77232       | 2 | 25.66 |
| IL1B          | 218              | 228             | NKIEINNKLEF             | 1361.74234       | 2 | 34.26 |
| IL1RI         | 59               | 81              | KDDSKTPVSTEQASRIHQHKEKL | 2662.39072       | 3 | 13    |
| IL1RI         | 314              | 324             | AKNTHGIDAAY             | 1160.56946       | 2 | 13.13 |
| IL1RI         | 170              | 181             | DNIHFSGVKDRL            | 1400.72809       | 2 | 16.55 |
| IL1RI         | 169              | 181             | LDNIHFSGVKDRL           | 1513.81215       | 2 | 17.79 |
| IL1RI         | 170              | 181             | DNIHFSGVKDRL            | 1400.72809       | 2 | 17.8  |
| IL1RI         | 82               | 94              | WFVPAKVEDSGHY           | 1534.7325        | 2 | 19.49 |
| IL1RI         | 204              | 215             | GKQYPITRVIEF            | 1450.80528       | 2 | 21.35 |
| IL1RI         | 325              | 334             | IQLIYPVTNF              | 1207.67214       | 2 | 26.72 |
| IL1RAcP       | 145              | 153             | PVHKLYIEY               | 1161.63027       | 2 | 17.25 |
| IL1RAcP       | 273              | 281             | LMDSRNEVW               | 1149.53572       | 2 | 17.93 |
| IL1RAcP       | 168              | 177             | PSSVKPTITW              | 1115.60954       | 2 | 18.99 |
| IL1RAcP       | 168              | 178             | PSSVKPTITWY             | 1278.67286       | 2 | 20.31 |

**Supplementary Table 10: Differential deuteration states for the 3-way IL1 $\beta$  complex proteins in the following conditions: unbound, bound, and unlabeled.**

| ProteinSource<br>/<br>startAA_stop<br>AA | Sequence                | MonoisotopicMass | AmountDeut |       |           |
|------------------------------------------|-------------------------|------------------|------------|-------|-----------|
|                                          |                         |                  | Free       | Bound | Unlabeled |
| IL1B/83_101                              | ESVDPKNYPKKKMEK<br>RFVF | 1185.635557      | 0.5        | 0     | 0         |
| IL1B/102_112                             | NKIEINNKLEF             | 681.374807       | 0.2        | 0     | 0         |
| IL1B/121_133                             | YISTSQAENMPVF           | 743.8477615      | 0.1        | 0     | 0         |
| IL1B/121_134                             | YISTSQAENMPVFL          | 800.3897935      | 1.2        | 0.6   | 0         |
| IL1RI/187_198                            | GKQYPITRVIEF            | 725.9062715      | 0.5        | 0.3   | 0         |

Peptides show decreased amount of deuteration in the bound state with respect to the unbound (free) state. These peptides are indicative of an interface area between proteins.



**Supplementary Table 11: Advantages of protein painting compared to existing methods**

|                                          | <b>PP</b>                                                                                                                   | <b>CL</b>                                                                                                                                                                            | <b>HDX</b>                                                                                                                  | <b>OHF</b>                                                                                                            |
|------------------------------------------|-----------------------------------------------------------------------------------------------------------------------------|--------------------------------------------------------------------------------------------------------------------------------------------------------------------------------------|-----------------------------------------------------------------------------------------------------------------------------|-----------------------------------------------------------------------------------------------------------------------|
| Experimental set up                      | Standard                                                                                                                    | Standard                                                                                                                                                                             | Optimized for deuterium retention                                                                                           | Optimized for UV pulse shorter than 1 microsecond                                                                     |
| Timing of treatment                      | Short (few minutes)                                                                                                         | 0.5-2 hours                                                                                                                                                                          | Short (few minutes)                                                                                                         | 1 microsecond and shorter                                                                                             |
| pH conditions                            | Neutral                                                                                                                     | Neutral-basic                                                                                                                                                                        | Strongly acidic (pH=2)                                                                                                      | Neutral-slightly basic                                                                                                |
| Temperature                              | Room temperature, -20°C for delayed MS analysis                                                                             | Room temperature, -20°C for delayed MS analysis                                                                                                                                      | Room temperature, 4 °C, and -80 °C                                                                                          | Room temperature, -20°C for delayed MS analysis                                                                       |
| Resolution                               | Half of any trypsin fragment (for two interacting partners, average 4.5 aa, resolution of paint molecules 3 aa)             | Restricted to trypsin fragments that contain primary amine, carboxyl, sulfhydryl, or carbonyl groups depending on the cross-linker of choice                                         | Pepsin fragment length, average 10 aa                                                                                       | Half of trypsin fragment with caveat that oxidized arginine might not be cleaved by trypsin                           |
| Software                                 | No special requirements: standard ms workflow and software                                                                  | Dedicated software                                                                                                                                                                   | Dedicated software                                                                                                          | Manually search in the MS spectra for oxidized products                                                               |
| Protein state                            | Pre-formed complex coated non covalently with small dye molecules                                                           | Pre-formed complex covalently crosslinked                                                                                                                                            | Pre-formed complex deuterated                                                                                               | Pre-formed complex oxidized                                                                                           |
| Output of the method (positive)          | Interaction regions are identified by presence of tryptic peptides exclusively derived from both sides of the interface     | Binding partners are identified with low specificity for interface solvent excluded binding regions                                                                                  | Interaction regions are identified by a small 1.0073 Dalton shift in peptic fragment peptide mass                           | Interaction regions are identified by absence of oxidation                                                            |
| Side reaction products / false positives | Within-protein interactions are not identified as false positive because the method is differential (unbound – bound state) | Internal crosslinks, modified peptide (type 0) and cyclic peptide (type 1) are identified as side reaction products                                                                  | Within-protein interactions are not identified as false positive because the method is differential (unbound – bound state) | OH radical reaction can cause proteins to unfold. Oxidized residues can pre-exist prior to treatment (e.g methionine) |
| Coverage                                 | Known distribution of trypsin cleavage sites preferred for MS                                                               | Protease fragments that contain primary amine, carboxyl, sulfhydryl, or carbonyl groups depending on the cross-linker of choice. Cross-linked lysine will not be cleaved by trypsin. | Pepsin cleavage peptides                                                                                                    | Trypsin cleavage sites with possible exception of oxidized Arginine                                                   |

PP = protein painting; CL = crosslinking; HDX = hydrogen deuterium exchange; OHF = hydroxyl footprinting.

## Supplementary Note 1

Conformational changes that affect solvent accessibility for residues that don't belong to the interface are an unlikely source of false positive results in the protein painting method. Such an event has very low probability since the protein painting method is applied to pre-formed protein complexes, for the following reasons.

Analysis of the solvent accessibility of monomeric proteins revealed that few residues (15% in larger proteins) are completely excluded from solvent contact so that the accessible-surface-area (ASA) is effectively zero<sup>7</sup>. Accessibility was defined as the ratio of the residue ASA in the native protein to the ASA it would have in an unfolded and extended polypeptide (Gly-X-Gly, where X is the residue of interest, average ASA in unfolded state=174Å<sup>2</sup>). The accessibility threshold was set at 5%, whereas residues with native ASA>5% unfolded ASA were considered on the surface and residues with native ASA <5% unfolded ASA were considered buried in the interior of the protein<sup>7</sup>.

In the particular case of K and R residues, partition coefficient measurement and transfer free energy calculations revealed a high propensity of the residues to partition to the surface of the protein<sup>7</sup>.

The extent of conformational change in residues not belonging to an interface greatly varies depending on the type of complex that is formed. In particular, conformational changes correlate to the size of complex interface. Analysis of the structural aspects of protein-protein interactions revealed that a typical standard size for the interface area is in the range of 1600 (+/- 400) Å (70% of analyzed proteins)<sup>8</sup>.

Proteins that form complexes within the standard size interface undergo small changes in conformation upon complex formation<sup>8</sup>. These small changes in conformation include shifts in surface loops or movements of short segments of peptide chains by up to 1.5 Å and rotation of surface side chains. Approximately 30% of analyzed protein-protein complex presented an interface area larger than 2000 Å. The formation of such complexes involved large changes in conformation of three major types: 1) disorder to order transitions; 2) large movements of the main chain; and 3) in multi-domain proteins, change of the relative position of the domains<sup>8</sup>. Consequently protein-protein complexes with standard size interfaces are unlikely to be associated with a change in solvent accessibility in residues not belonging to protein interface compared to large size interface complexes.”

### Supplementary References:

1. Ozbabacan, S.E., Engin, H.B., Gursoy, A. & Keskin, O. Transient protein-protein interactions. *Protein Eng. Des. Sel.* **24**, 635-648 (2011).
2. Krissinel, E. & Henrick, K. Inference of macromolecular assemblies from crystalline state. *J. Mol. Biol.* **372**, 774-797 (2007).
3. Thangudu, R.R., Bryant, S.H., Panchenko, A.R. & Madej, T. Modulating protein-protein interactions with small molecules: the importance of binding hotspots. *J. Mol. Biol.* **415**, 443-453 (2012).
4. Götze, M. et al. StavroX--a software for analyzing crosslinked products in protein interaction studies. *J. Am. Soc. Mass. Spectrom.* **23**, 76-87 (2012).
5. Gianazza, E. & Arnaud, P. Chromatography of plasma proteins on immobilized Cibacron Blue F3-GA. Mechanism of the molecular interaction. *Biochem. J.* **203**, 637-641 (1982).
6. Gasymov, O.K. & Glasgow, B.J. ANS fluorescence: potential to augment the identification of the external binding sites of proteins. *Biochim. Biophys. Acta* **1774**, 403-411 (2007).
7. Miller, S., Janin, J., Lesk, A.M. & Chothia, C. Interior and surface of monomeric proteins. *J. Mol. Biol.* **196**, 641-656 (1987).
8. Lo Conte, L., Chothia, C. & Janin, J. The atomic structure of protein-protein recognition sites. *J. Mol. Biol.* **285**, 2177-2198 (1999).
